# Supplementary material
Source: PubMed Central journal article supplement (PMC8246749)
Supplement: EVJ-53-690-s004.pdf [file EVJ-53-690-s004.pdf]

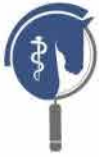

## Do commercial genetic tests for PSSM2 and myofibrillar myopathy (MFM) correspond to a histopathological diagnosis?

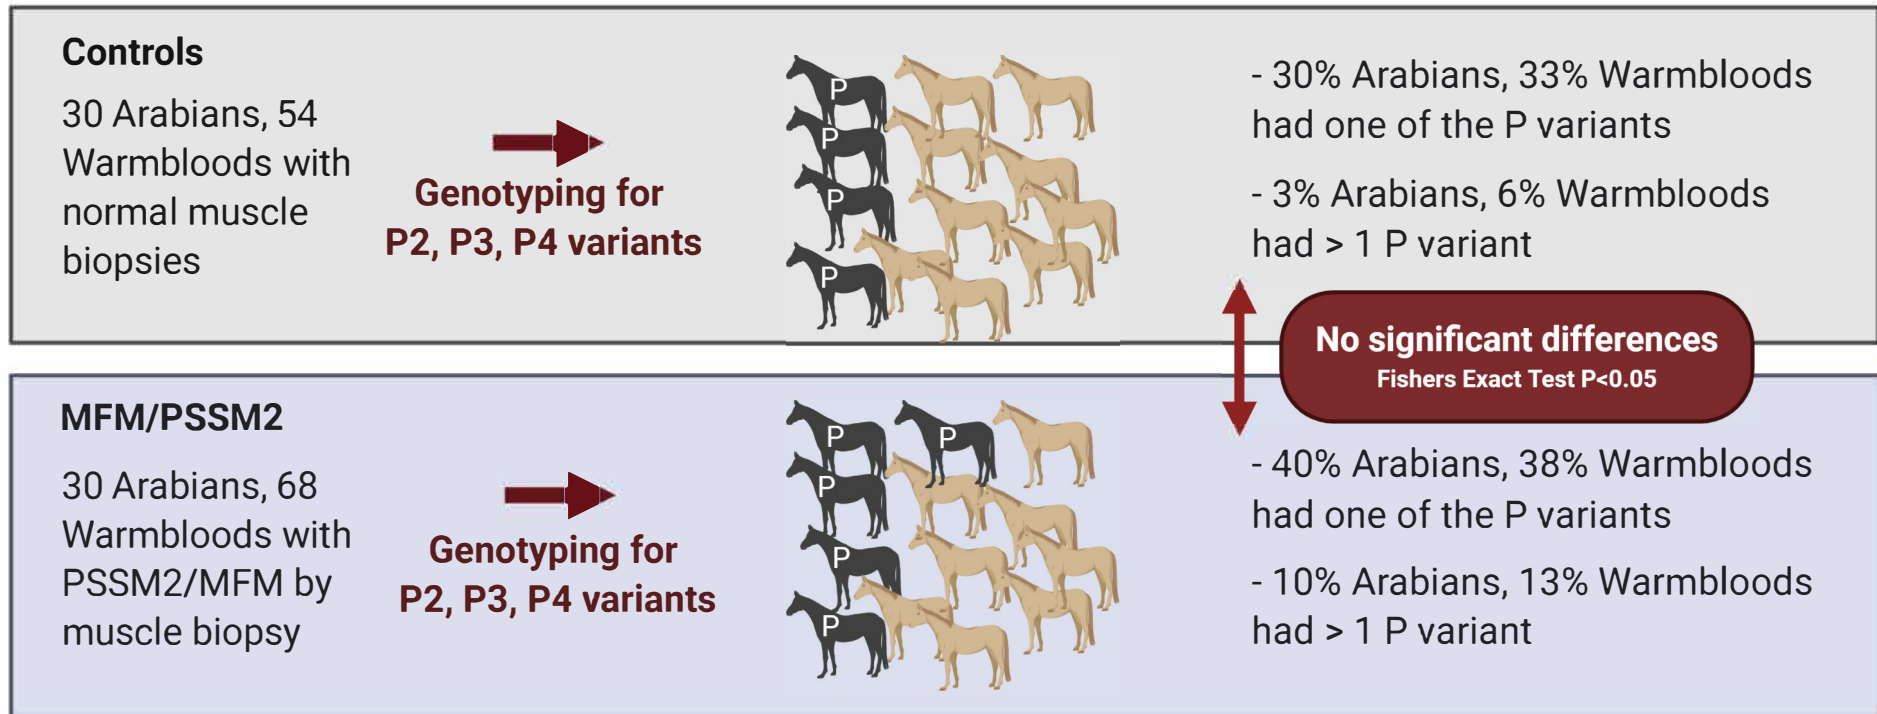

Test sensitivity for each P variant was < 33%

P2 and P3 were present in 25 early domestic and modern breeds (public repositories)

**A single or combination of commercial genetic test P variants were not statistically associated with a histological diagnosis of PSSM2 and MFM, the means by which these diseases were discovered**
