# Supplementary material
Source: PubMed Central journal article supplement (PMC8246749)
Supplement: EVJ-53-690-s005.pdf [file EVJ-53-690-s005.pdf]

**Table S5: A.** The number of horses with no P variant alleles, one P variant allele, or > 1 P variant allele, and the percentage of horses that possessed > 1 P variant allele across all three loci. P-values are given for comparisons of the number of horses with none, one, or > 1 P variant allele between control and PSSM2 or MFM horses by breed. **B.** The number of horses with no P variant loci, one P variant locus, or > 1 P variant locus, and the percentage of horses that possessed > 1 P variant locus. P-values represent the comparisons of the number of horses with none, one, or > 1 variant loci between control and PSSM2 or MFM horses by breed.

| A. |            | N  | Zero Variant Alleles | One Variant Allele | >1 Variant Allele | P-value |
|----|------------|----|----------------------|--------------------|-------------------|---------|
|    | Control-WB | 54 | 33                   | 18                 | 3                 |         |
|    | PSSM2-WB   | 55 | 29                   | 18                 | 8                 | 0.33    |
|    | MFM -WB    | 37 | 15                   | 18                 | 4                 | 0.15    |
|    | Control-AR | 30 | 20                   | 9                  | 1                 |         |
|    | PSSM2-AR   | 18 | 10                   | 7                  | 1                 | 0.68    |
|    | MFM -AR    | 30 | 15                   | 12                 | 3                 | 0.32    |
| B. |            |    | Zero Variant Loci    | One Variant Locus  | >1 Variant Locus  | P-value |
|    | Control-WB | 54 | 33                   | 19                 | 2                 |         |
|    | PSSM2-WB   | 55 | 29                   | 20                 | 6                 | 0.36    |
|    | MFM -WB    | 37 | 15                   | 19                 | 3                 | 0.13    |
|    | Control-AR | 30 | 20                   | 9                  | 1                 |         |
|    | PSSM2-AR   | 18 | 10                   | 8                  | 0                 | 0.61    |
|    | MFM -AR    | 30 | 15                   | 13                 | 2                 | 0.41    |
