# Supplementary material
Source: PubMed Central journal article supplement (PMC8246749)
Supplement: EVJ-53-690-s008.pdf [file EVJ-53-690-s008.pdf]

**Table S1:** P variant coordinates, SNP identifiers, and primers utilised for genotyping (EquCab 2) by pyrosequencing.

| SNP | Gene         | Chromosome | Coordinate | SNP ID and polymorphism (coding strand) | Fwd Primer (5'-3')         | Rev Primer (5'-3')       | Sequencing Primer (5'-3') |
|-----|--------------|------------|------------|-----------------------------------------|----------------------------|--------------------------|---------------------------|
| P2  | <i>MYOT</i>  | 14         | 38519183   | rs1138656462                            | CTGGCACTTGAA<br>TGAAACGA   | TGATAATTTCCGCA<br>TGGTGA | ACATCTCCCCTTGAAG          |
|     |              |            |            | (T/C)                                   |                            |                          |                           |
| P3a | <i>FLNC</i>  | 4          | 83736244   | rs1139799323                            | GAGCCACCTAT<br>TTCACCG     | CAGGCCCCGTCTCC<br>TACT   | TTCACCGTGGACTGC           |
|     |              |            |            | (G/A)                                   |                            |                          |                           |
| P3b | <i>FLNC</i>  | 4          | 83738769   | rs1142918816                            | CTTCCCCGGCAC<br>CTACACTATT | CCCGAGACCTTGAC<br>TCCACT | CGCGTCCATGTGCAG           |
|     |              |            |            | (G/A)                                   |                            |                          |                           |
| P4  | <i>MYOZ3</i> | 14         | 27399222   | rs1142544043                            | CGTGCCCCAGGA<br>CCTGAT     | GCTGGCTGGCTGCA<br>AACT   | GATGATGGAAGAGCTGT         |
|     |              |            |            | (C/T)                                   |                            |                          |                           |
